# Supplementary material for: Smoking trajectory and cancer risk: A population-based cohort study
Source: PubMed Central journal article supplement (PMC9413414; doi:10.18332/tid/152137), 2022-08-26
Supplement: TID-20-71-s1.pdf [file TID-20-71-s1.pdf]

Appendix Table 1. Smoking trajectory group and cancer incidence by age group

| Cancer site                         | Adjusted hazard ratio (95% CI) |                     |                    |                    |                    |
|-------------------------------------|--------------------------------|---------------------|--------------------|--------------------|--------------------|
|                                     | 20-29 years                    | 30-39 years         | 40-49 years        | 50-59 years        | ≥60 years          |
| <b>All cancer</b>                   |                                |                     |                    |                    |                    |
| Never smokers                       | ref                            | ref                 | ref                | ref                | ref                |
| Former smokers                      | 0.94 (0.82 - 1.08)             | 0.97 (0.91 - 1.03)  | 1.07 (1.03 - 1.11) | 1.11 (1.07 - 1.15) | 1.2 (1.16 - 1.25)  |
| New current smokers                 | 1.03 (0.92 - 1.16)             | 1.06 (1.00 - 1.12)  | 1.11 (1.07 - 1.15) | 1.13 (1.10 - 1.17) | 1.21 (1.17 - 1.25) |
| Decreasing light smokers            | 1.01 (0.93 - 1.10)             | 1.08 (1.03 - 1.13)  | 1.24 (1.20 - 1.28) | 1.33 (1.29 - 1.37) | 1.45 (1.41 - 1.50) |
| Steady moderate smokers             | 0.94 (0.87 - 1.01)             | 1.12 (1.07 - 1.17)  | 1.40 (1.36 - 1.44) | 1.57 (1.52 - 1.61) | 1.71 (1.65 - 1.77) |
| Steady heavy smokers                | 0.88 (0.76 - 1.02)             | 1.13 (1.06 - 1.22)  | 1.50 (1.43 - 1.57) | 1.81 (1.71 - 1.91) | 2.05 (1.84 - 2.29) |
| <b>Lip, oral cavity and pharynx</b> |                                |                     |                    |                    |                    |
| Never smokers                       | ref                            | ref                 | ref                | ref                | ref                |
| Former smokers                      | 0.50 (0.11 - 2.17)             | 1.13 (0.70 - 1.83)  | 1.00 (0.74 - 1.35) | 1.35 (0.98 - 1.85) | 1.19 (0.82 - 1.72) |
| New current smokers                 | 1.40 (0.59 - 3.30)             | 1.24 (0.78 - 1.97)  | 1.01 (0.74 - 1.37) | 1.42 (1.06 - 1.92) | 1.25 (0.91 - 1.72) |
| Decreasing light smokers            | 1.29 (0.66 - 2.50)             | 1.27 (0.86 - 1.87)  | 1.10 (0.84 - 1.44) | 1.58 (1.18 - 2.10) | 1.69 (1.23 - 2.32) |
| Steady moderate smokers             | 1.21 (0.66 - 2.23)             | 1.60 (1.13 - 2.27)  | 1.61 (1.27 - 2.04) | 2.23 (1.71 - 2.90) | 2.10 (1.51 - 2.94) |
| Steady heavy smokers                | 0.87 (0.25 - 3.05)             | 2.36 (1.48 - 3.77)  | 1.15 (0.76 - 1.76) | 3.07 (2.00 - 4.7)  | 2.67 (1.08 - 6.62) |
| <b>Esophagus</b>                    |                                |                     |                    |                    |                    |
| Never smokers                       | ref                            | ref                 | ref                | ref                | ref                |
| Former smokers                      | n/a                            | 3.37 (0.84 - 13.50) | 1.40 (0.91 - 2.16) | 1.75 (1.28 - 2.38) | 1.35 (1.02 - 1.78) |
| New current smokers                 | n/a                            | 2.86 (0.68 - 11.97) | 1.62 (1.05 - 2.50) | 1.55 (1.15 - 2.11) | 1.16 (0.90 - 1.50) |
| Decreasing light smokers            | 0.81 (0.05 - 13.04)            | 3.24 (0.91 - 11.52) | 2.08 (1.43 - 3.03) | 2.34 (1.78 - 3.08) | 1.53 (1.19 - 1.96) |
| Steady moderate smokers             | 3.02 (0.36 - 24.99)            | 6.53 (2.01 - 21.20) | 3.66 (2.60 - 5.14) | 3.11 (2.41 - 4.02) | 1.68 (1.29 - 2.19) |
| Steady heavy smokers                | 3.34 (0.20 - 56.97)            | 9.57 (2.65 - 34.65) | 3.49 (2.24 - 5.45) | 3.23 (2.16 - 4.84) | 1.55 (0.68 - 3.53) |
| <b>Stomach</b>                      |                                |                     |                    |                    |                    |
| Never smokers                       | ref                            | ref                 | ref                | ref                | ref                |
| Former smokers                      | 0.99 (0.64 - 1.53)             | 1.20 (1.04 - 1.38)  | 1.20 (1.11 - 1.31) | 1.18 (1.09 - 1.28) | 1.28 (1.17 - 1.40) |
| New current smokers                 | 1.30 (0.92 - 1.82)             | 1.32 (1.15 - 1.51)  | 1.28 (1.18 - 1.39) | 1.15 (1.07 - 1.24) | 1.32 (1.22 - 1.42) |
| Decreasing light smokers            | 1.23 (0.95 - 1.60)             | 1.39 (1.24 - 1.56)  | 1.48 (1.38 - 1.59) | 1.45 (1.36 - 1.56) | 1.50 (1.38 - 1.62) |
| Steady moderate smokers             | 1.58 (1.26 - 1.99)             | 1.62 (1.46 - 1.80)  | 1.75 (1.64 - 1.87) | 1.60 (1.50 - 1.71) | 1.56 (1.43 - 1.71) |
| Steady heavy smokers                | 1.42 (0.95 - 2.13)             | 1.87 (1.61 - 2.18)  | 1.80 (1.62 - 2.00) | 1.51 (1.31 - 1.73) | 1.61 (1.20 - 2.16) |
| <b>Colorectum</b>                   |                                |                     |                    |                    |                    |
| Never smokers                       | ref                            | ref                 | ref                | ref                | ref                |
| Former smokers                      | 0.70 (0.42 - 1.17)             | 1.02 (0.87 - 1.20)  | 1.18 (1.07 - 1.30) | 1.10 (1.01 - 1.21) | 1.19 (1.08 - 1.32) |
| New current smokers                 | 1.31 (0.93 - 1.83)             | 1.09 (0.93 - 1.27)  | 1.14 (1.04 - 1.26) | 1.13 (1.03 - 1.22) | 1.16 (1.06 - 1.26) |
| Decreasing light smokers            | 1.12 (0.85 - 1.46)             | 1.05 (0.92 - 1.20)  | 1.29 (1.19 - 1.41) | 1.39 (1.28 - 1.50) | 1.26 (1.15 - 1.38) |
| Steady moderate smokers             | 0.98 (0.77 - 1.26)             | 1.17 (1.04 - 1.31)  | 1.42 (1.31 - 1.54) | 1.35 (1.25 - 1.46) | 1.24 (1.12 - 1.38) |
| Steady heavy smokers                | 1.16 (0.75 - 1.78)             | 1.03 (0.85 - 1.26)  | 1.39 (1.22 - 1.58) | 1.26 (1.07 - 1.50) | 1.18 (0.82 - 1.71) |
| <b>Liver</b>                        |                                |                     |                    |                    |                    |

|                          |                     |                     |                     |                      |                      |
|--------------------------|---------------------|---------------------|---------------------|----------------------|----------------------|
| Never smokers            | ref                 | ref                 | ref                 | ref                  | ref                  |
| Former smokers           | 0.78 (0.34 - 1.76)  | 0.77 (0.60 - 0.98)  | 1.07 (0.94 - 1.21)  | 1.02 (0.90 - 1.16)   | 1.02 (0.90 - 1.16)   |
| New current smokers      | 1.49 (0.85 - 2.59)  | 1.21 (0.99 - 1.49)  | 1.31 (1.17 - 1.48)  | 1.16 (1.03 - 1.29)   | 1.16 (1.03 - 1.29)   |
| Decreasing light smokers | 1.52 (0.98 - 2.35)  | 1.39 (1.17 - 1.66)  | 1.76 (1.59 - 1.95)  | 1.35 (1.21 - 1.51)   | 1.35 (1.21 - 1.51)   |
| Steady moderate smokers  | 1.29 (0.85 - 1.95)  | 1.78 (1.52 - 2.08)  | 1.93 (1.75 - 2.13)  | 1.54 (1.39 - 1.71)   | 1.54 (1.39 - 1.71)   |
| Steady heavy smokers     | 1.56 (0.80 - 3.07)  | 0.95 (0.71 - 1.27)  | 1.47 (1.24 - 1.75)  | 1.27 (1.01 - 1.60)   | 1.27 (1.01 - 1.60)   |
| <b>Pancreas</b>          |                     |                     |                     |                      |                      |
| Never smokers            | ref                 | ref                 | ref                 | ref                  | ref                  |
| Former smokers           | 1.97 (0.59 - 6.55)  | 0.98 (0.62 - 1.55)  | 0.95 (0.74 - 1.21)  | 1.05 (0.86 - 1.30)   | 1.18 (0.96 - 1.45)   |
| New current smokers      | 2.08 (0.75 - 5.75)  | 1.04 (0.66 - 1.62)  | 1.01 (0.79 - 1.29)  | 1.12 (0.92 - 1.35)   | 1.08 (0.90 - 1.29)   |
| Decreasing light smokers | 1.04 (0.40 - 2.70)  | 1.16 (0.80 - 1.67)  | 1.24 (1.00 - 1.53)  | 1.26 (1.04 - 1.52)   | 1.23 (1.01 - 1.49)   |
| Steady moderate smokers  | 1.29 (0.57 - 2.95)  | 1.56 (1.13 - 2.15)  | 1.54 (1.27 - 1.87)  | 1.50 (1.26 - 1.79)   | 1.83 (1.50 - 2.23)   |
| Steady heavy smokers     | 0.47 (0.06 - 3.78)  | 1.98 (1.25 - 3.12)  | 1.83 (1.36 - 2.46)  | 2.15 (1.57 - 2.95)   | 1.53 (0.76 - 3.11)   |
| <b>Larynx</b>            |                     |                     |                     |                      |                      |
| Never smokers            | ref                 | ref                 | ref                 | ref                  | ref                  |
| Former smokers           | 4.34 (0.27 - 70.43) | 1.25 (0.35 - 4.43)  | 1.91 (1.05 - 3.47)  | 3.10 (1.80 - 5.32)   | 1.66 (1.03 - 2.68)   |
| New current smokers      | n/a                 | 2.67 (0.95 - 7.49)  | 2.08 (1.14 - 3.78)  | 2.56 (1.50 - 4.39)   | 1.58 (1.03 - 2.43)   |
| Decreasing light smokers | 1.93 (0.17 - 21.62) | 1.80 (0.67 - 4.80)  | 3.45 (2.07 - 5.78)  | 4.45 (2.72 - 7.28)   | 2.85 (1.91 - 4.25)   |
| Steady moderate smokers  | 1.48 (0.15 - 14.53) | 2.55 (1.05 - 6.21)  | 5.88 (3.64 - 9.52)  | 9.24 (5.84 - 14.63)  | 3.58 (2.37 - 5.42)   |
| Steady heavy smokers     | 5.03 (0.29 - 85.87) | 4.36 (1.52 - 12.51) | 8.47 (4.85 - 14.82) | 15.03 (8.63 - 26.19) | 6.29 (2.64 - 14.98)  |
| <b>Lung</b>              |                     |                     |                     |                      |                      |
| Never smokers            | ref                 | ref                 | ref                 | ref                  | ref                  |
| Former smokers           | 1.16 (0.53 - 2.56)  | 1.17 (0.89 - 1.53)  | 1.20 (1.04 - 1.40)  | 1.47 (1.29 - 1.67)   | 2.26 (2.02 - 2.52)   |
| New current smokers      | 1.34 (0.71 - 2.52)  | 0.92 (0.69 - 1.23)  | 1.23 (1.06 - 1.44)  | 1.64 (1.46 - 1.84)   | 2.16 (1.96 - 2.39)   |
| Decreasing light smokers | 1.14 (0.68 - 1.90)  | 1.10 (0.88 - 1.38)  | 1.66 (1.46 - 1.89)  | 2.88 (2.60 - 3.20)   | 4.36 (3.97 - 4.79)   |
| Steady moderate smokers  | 1.28 (0.81 - 2.01)  | 1.52 (1.24 - 1.85)  | 2.85 (2.54 - 3.19)  | 5.23 (4.75 - 5.75)   | 6.75 (6.14 - 7.41)   |
| Steady heavy smokers     | 1.63 (0.78 - 3.41)  | 2.20 (1.66 - 2.91)  | 4.66 (4.03 - 5.40)  | 8.46 (7.43 - 9.64)   | 10.09 (8.35 - 12.19) |
| <b>Kidney</b>            |                     |                     |                     |                      |                      |
| Never smokers            | ref                 | ref                 | ref                 | ref                  | ref                  |
| Former smokers           | 0.59 (0.27 - 1.31)  | 0.89 (0.69 - 1.16)  | 0.96 (0.80 - 1.16)  | 1.07 (0.87 - 1.32)   | 0.89 (0.66 - 1.21)   |
| New current smokers      | 0.82 (0.46 - 1.46)  | 1.07 (0.84 - 1.36)  | 1.00 (0.83 - 1.20)  | 1.07 (0.88 - 1.31)   | 0.97 (0.75 - 1.25)   |
| Decreasing light smokers | 1.06 (0.71 - 1.58)  | 1.02 (0.84 - 1.25)  | 1.04 (0.88 - 1.23)  | 0.84 (0.68 - 1.05)   | 1.06 (0.81 - 1.40)   |
| Steady moderate smokers  | 1.25 (0.89 - 1.77)  | 0.97 (0.81 - 1.17)  | 1.07 (0.91 - 1.25)  | 1.11 (0.92 - 1.35)   | 1.04 (0.75 - 1.43)   |
| Steady heavy smokers     | 0.87 (0.44 - 1.74)  | 1.02 (0.75 - 1.38)  | 1.21 (0.93 - 1.58)  | 1.30 (0.88 - 1.94)   | 1.72 (0.70 - 4.21)   |
| <b>Bladder</b>           |                     |                     |                     |                      |                      |
| Never smokers            | ref                 | ref                 | ref                 | ref                  | ref                  |
| Former smokers           | 0.36 (0.05 - 2.79)  | 1.44 (0.87 - 2.37)  | 1.51 (1.19 - 1.91)  | 1.4 (1.16 - 1.70)    | 1.33 (1.12 - 1.58)   |
| New current smokers      | 0.47 (0.10 - 2.11)  | 1.73 (1.08 - 2.76)  | 1.75 (1.39 - 2.21)  | 1.46 (1.22 - 1.74)   | 1.44 (1.25 - 1.67)   |
| Decreasing light smokers | 2.02 (0.98 - 4.17)  | 2.33 (1.58 - 3.43)  | 1.83 (1.48 - 2.28)  | 1.81 (1.53 - 2.15)   | 1.58 (1.36 - 1.85)   |

|                          |                    |                    |                    |                    |                    |
|--------------------------|--------------------|--------------------|--------------------|--------------------|--------------------|
| Steady moderate smokers  | 1.50 (0.75 - 3.01) | 2.74 (1.91 - 3.95) | 2.27 (1.86 - 2.77) | 2.26 (1.92 - 2.65) | 2.01 (1.71 - 2.37) |
| Steady heavy smokers     | 1.70 (0.53 - 5.44) | 3.50 (2.18 - 5.62) | 2.84 (2.13 - 3.79) | 2.69 (2.00 - 3.60) | 2.47 (1.51 - 4.02) |
| <b>Leukemia</b>          |                    |                    |                    |                    |                    |
| Never smokers            | ref                | ref                | ref                | ref                | ref                |
| Former smokers           | 0.94 (0.46 - 1.95) | 0.87 (0.58 - 1.31) | 1.11 (0.81 - 1.51) | 1.16 (0.81 - 1.65) | 0.97 (0.69 - 1.36) |
| New current smokers      | 1.27 (0.74 - 2.18) | 1.24 (0.87 - 1.76) | 1.27 (0.94 - 1.72) | 1.55 (1.15 - 2.10) | 1.22 (0.92 - 1.60) |
| Decreasing light smokers | 0.83 (0.52 - 1.32) | 0.92 (0.67 - 1.27) | 1.28 (0.97 - 1.69) | 1.49 (1.09 - 2.02) | 1.30 (0.96 - 1.75) |
| Steady moderate smokers  | 0.76 (0.50 - 1.14) | 0.92 (0.69 - 1.24) | 1.14 (0.87 - 1.49) | 1.79 (1.34 - 2.40) | 1.54 (1.11 - 2.14) |
| Steady heavy smokers     | 0.6 (0.24 - 1.54)  | 1.09 (0.67 - 1.76) | 1.52 (1.00 - 2.31) | 1.74 (0.96 - 3.15) | 0.48 (0.07 - 3.44) |
| <b>Others</b>            |                    |                    |                    |                    |                    |
| Never smokers            | ref                | ref                | ref                | ref                | ref                |
| Former smokers           | 0.94 (0.46 - 1.95) | 0.90 (0.83 - 0.99) | 0.94 (0.89 - 1.00) | 0.98 (0.93 - 1.04) | 0.99 (0.93 - 1.05) |
| New current smokers      | 1.27 (0.74 - 2.18) | 0.93 (0.86 - 1.01) | 0.92 (0.86 - 0.98) | 0.98 (0.93 - 1.03) | 1.02 (0.96 - 1.07) |
| Decreasing light smokers | 0.83 (0.52 - 1.32) | 0.95 (0.88 - 1.01) | 0.92 (0.87 - 0.97) | 0.95 (0.90 - 1.01) | 0.95 (0.90 - 1.01) |
| Steady moderate smokers  | 0.76 (0.50 - 1.14) | 0.82 (0.76 - 0.87) | 0.84 (0.80 - 0.89) | 0.91 (0.86 - 0.96) | 0.95 (0.89 - 1.02) |
| Steady heavy smokers     | 0.60 (0.24 - 1.54) | 0.77 (0.69 - 0.87) | 0.86 (0.77 - 0.95) | 1.01 (0.90 - 1.14) | 1.12 (0.89 - 1.41) |

Appendix Table 2. Smoking trajectory group and cancer mortality by age group

| Cancer site                         | Adjusted hazard ratio (95% CI) |                     |                    |                     |                    |
|-------------------------------------|--------------------------------|---------------------|--------------------|---------------------|--------------------|
|                                     | 20-29 years                    | 30-39 years         | 40-49 years        | 50-59 years         | ≥60 years          |
| <b>All cancer</b>                   |                                |                     |                    |                     |                    |
| Never smokers                       | ref                            | ref                 | ref                | ref                 | ref                |
| Former smokers                      | 0.79 (0.48 - 1.29)             | 0.86 (0.72 - 1.02)  | 1.07 (0.98 - 1.17) | 1.14 (1.06 - 1.23)  | 1.30 (1.23 - 1.37) |
| New current smokers                 | 1.34 (0.97 - 1.85)             | 1.06 (0.91 - 1.24)  | 1.10 (1.01 - 1.20) | 1.21 (1.14 - 1.30)  | 1.30 (1.24 - 1.36) |
| Decreasing light smokers            | 1.06 (0.81 - 1.40)             | 1.08 (0.94 - 1.22)  | 1.44 (1.34 - 1.56) | 1.69 (1.59 - 1.80)  | 1.85 (1.77 - 1.94) |
| Steady moderate smokers             | 0.95 (0.75 - 1.22)             | 1.29 (1.15 - 1.44)  | 1.79 (1.68 - 1.92) | 2.28 (2.16 - 2.41)  | 2.39 (2.28 - 2.51) |
| Steady heavy smokers                | 1.31 (0.90 - 1.92)             | 1.25 (1.04 - 1.49)  | 2.18 (1.98 - 2.40) | 2.80 (2.54 - 3.07)  | 3.01 (2.62 - 3.46) |
| <b>Lip, oral cavity and pharynx</b> |                                |                     |                    |                     |                    |
| Never smokers                       | ref                            | ref                 | ref                | ref                 | ref                |
| Former smokers                      | n/a                            | 1.40 (0.31 - 6.26)  | 0.81 (0.38 - 1.77) | 1.57 (0.82 - 3.01)  | 1.17 (0.72 - 1.92) |
| New current smokers                 | 5.12 (0.46 - 56.83)            | 2.16 (0.58 - 8.04)  | 1.14 (0.56 - 2.33) | 2.18 (1.24 - 3.82)  | 0.99 (0.63 - 1.56) |
| Decreasing light smokers            | n/a                            | 2.82 (0.92 - 8.69)  | 1.25 (0.67 - 2.33) | 2.14 (1.22 - 3.73)  | 1.53 (0.99 - 2.36) |
| Steady moderate smokers             | 3.45 (0.42 - 28.54)            | 2.57 (0.88 - 7.55)  | 2.64 (1.55 - 4.48) | 2.85 (1.69 - 4.80)  | 2.18 (1.40 - 3.40) |
| Steady heavy smokers                | 3.73 (0.22 - 62.70)            | 3.26 (0.86 - 12.44) | 2.73 (1.29 - 5.78) | 6.06 (3.05 - 12.03) | 3.93 (1.4 - 11.05) |
| <b>Esophagus</b>                    |                                |                     |                    |                     |                    |
| Never smokers                       | ref                            | ref                 | ref                | ref                 | ref                |
| Former smokers                      | n/a                            | 1.92 (0.27 - 13.72) | 1.08 (0.50 - 2.30) | 1.71 (1.03 - 2.85)  | 1.46 (1.04 - 2.05) |
| New current smokers                 | n/a                            | n/a                 | 1.13 (0.52 - 2.46) | 1.42 (0.86 - 2.36)  | 1.25 (0.92 - 1.71) |
| Decreasing light smokers            | n/a                            | 2.04 (0.39 - 10.54) | 2.54 (1.40 - 4.58) | 2.74 (1.78 - 4.22)  | 1.56 (1.15 - 2.12) |
| Steady moderate smokers             | n/a                            | 3.26 (0.74 - 14.28) | 3.49 (2.01 - 6.07) | 3.44 (2.28 - 5.20)  | 1.82 (1.31 - 2.51) |
| Steady heavy smokers                | n/a                            | 6.03 (1.18 - 30.72) | 3.82 (1.91 - 7.67) | 3.81 (2.07 - 7.00)  | 1.24 (0.39 - 3.94) |
| <b>Stomach</b>                      |                                |                     |                    |                     |                    |
| Never smokers                       | ref                            | ref                 | ref                | ref                 | ref                |
| Former smokers                      | n/a                            | 1.18 (0.78 - 1.79)  | 1.30 (1.00 - 1.69) | 1.25 (0.98 - 1.59)  | 1.27 (1.07 - 1.49) |
| New current smokers                 | 0.88 (0.36 - 2.10)             | 0.95 (0.62 - 1.46)  | 1.19 (0.91 - 1.56) | 1.20 (0.96 - 1.50)  | 1.37 (1.19 - 1.58) |
| Decreasing light smokers            | 0.73 (0.36 - 1.48)             | 0.86 (0.60 - 1.25)  | 1.61 (1.28 - 2.03) | 1.86 (1.53 - 2.27)  | 1.59 (1.37 - 1.84) |
| Steady moderate smokers             | 0.83 (0.46 - 1.49)             | 1.21 (0.88 - 1.64)  | 1.98 (1.60 - 2.44) | 2.01 (1.66 - 2.43)  | 1.67 (1.42 - 1.97) |
| Steady heavy smokers                | 1.17 (0.45 - 3.02)             | 1.31 (0.82 - 2.10)  | 2.23 (1.65 - 3.03) | 2.07 (1.45 - 2.96)  | 1.96 (1.17 - 3.29) |
| <b>Colorectum</b>                   |                                |                     |                    |                     |                    |
| Never smokers                       | ref                            | ref                 | ref                | ref                 | ref                |
| Former smokers                      | 0.32 (0.04 - 2.48)             | 0.76 (0.45 - 1.28)  | 1.04 (0.80 - 1.36) | 0.95 (0.74 - 1.21)  | 1.12 (0.94 - 1.33) |
| New current smokers                 | 0.96 (0.36 - 2.54)             | 0.67 (0.40 - 1.15)  | 1.03 (0.79 - 1.34) | 1.00 (0.80 - 1.24)  | 1.12 (0.96 - 1.29) |
| Decreasing light smokers            | 0.66 (0.28 - 1.55)             | 0.94 (0.63 - 1.38)  | 1.24 (0.99 - 1.56) | 1.22 (0.99 - 1.49)  | 1.36 (1.17 - 1.59) |
| Steady moderate smokers             | 0.49 (0.23 - 1.04)             | 0.98 (0.69 - 1.39)  | 1.09 (0.87 - 1.35) | 1.29 (1.06 - 1.57)  | 1.36 (1.14 - 1.62) |
| Steady heavy smokers                | 1.31 (0.47 - 3.62)             | 0.87 (0.49 - 1.56)  | 1.19 (0.83 - 1.69) | 1.12 (0.74 - 1.70)  | 1.34 (0.71 - 2.52) |
| <b>Liver</b>                        |                                |                     |                    |                     |                    |

|                          |                     |                     |                    |                     |                      |
|--------------------------|---------------------|---------------------|--------------------|---------------------|----------------------|
| Never smokers            | ref                 | ref                 | ref                | ref                 | ref                  |
| Former smokers           | 0.82 (0.28 - 2.40)  | 0.76 (0.52 - 1.12)  | 1.07 (0.89 - 1.30) | 1.12 (0.95 - 1.33)  | 1.14 (0.97 - 1.33)   |
| New current smokers      | 0.97 (0.42 - 2.19)  | 1.30 (0.95 - 1.77)  | 1.30 (1.08 - 1.55) | 1.13 (0.97 - 1.33)  | 1.12 (0.98 - 1.28)   |
| Decreasing light smokers | 1.14 (0.62 - 2.07)  | 1.38 (1.06 - 1.79)  | 2.00 (1.72 - 2.33) | 1.43 (1.23 - 1.66)  | 1.41 (1.23 - 1.62)   |
| Steady moderate smokers  | 0.99 (0.57 - 1.70)  | 1.83 (1.45 - 2.31)  | 2.13 (1.84 - 2.46) | 1.65 (1.44 - 1.90)  | 1.55 (1.33 - 1.80)   |
| Steady heavy smokers     | 1.59 (0.69 - 3.66)  | 0.88 (0.57 - 1.38)  | 1.74 (1.38 - 2.21) | 1.33 (0.99 - 1.80)  | 1.45 (0.85 - 2.47)   |
| Pancreas                 |                     |                     |                    |                     |                      |
| Never smokers            | ref                 | ref                 | ref                | ref                 | ref                  |
| Former smokers           | 0.62 (0.07 - 5.18)  | 0.85 (0.50 - 1.46)  | 0.80 (0.60 - 1.05) | 1.02 (0.82 - 1.26)  | 1.08 (0.89 - 1.32)   |
| New current smokers      | 0.78 (0.16 - 3.89)  | 0.57 (0.31 - 1.04)  | 0.96 (0.74 - 1.25) | 0.97 (0.80 - 1.19)  | 1.00 (0.84 - 1.18)   |
| Decreasing light smokers | 0.75 (0.23 - 2.47)  | 1.03 (0.68 - 1.56)  | 1.03 (0.82 - 1.30) | 1.24 (1.03 - 1.50)  | 1.13 (0.94 - 1.36)   |
| Steady moderate smokers  | 1.05 (0.40 - 2.75)  | 1.18 (0.82 - 1.71)  | 1.31 (1.07 - 1.61) | 1.33 (1.11 - 1.59)  | 1.63 (1.35 - 1.97)   |
| Steady heavy smokers     | 0.75 (0.14 - 3.92)  | 1.51 (0.89 - 2.57)  | 1.65 (1.21 - 2.26) | 1.93 (1.41 - 2.65)  | 1.32 (0.65 - 2.66)   |
| Larynx                   |                     |                     |                    |                     |                      |
| Never smokers            | ref                 | ref                 | ref                | ref                 | ref                  |
| Former smokers           | n/a                 | n/a                 | n/a                | 0.32 (0.04 - 2.64)  | 1.44 (0.55 - 3.80)   |
| New current smokers      | n/a                 | n/a                 | n/a                | 0.94 (0.27 - 3.34)  | 2.00 (0.91 - 4.41)   |
| Decreasing light smokers | n/a                 | n/a                 | n/a                | 1.39 (0.47 - 4.17)  | 3.44 (1.64 - 7.23)   |
| Steady moderate smokers  | n/a                 | n/a                 | n/a                | 4.03 (1.63 - 9.96)  | 3.51 (1.59 - 7.74)   |
| Steady heavy smokers     | n/a                 | n/a                 | n/a                | 6.16 (1.82 - 20.82) | 7.32 (1.58 - 33.9)   |
| Lung                     |                     |                     |                    |                     |                      |
| Never smokers            | ref                 | ref                 | ref                | ref                 | ref                  |
| Former smokers           | 0.72 (0.16 - 3.23)  | 0.69 (0.38 - 1.24)  | 1.33 (1.06 - 1.66) | 1.59 (1.33 - 1.89)  | 2.20 (1.97 - 2.46)   |
| New current smokers      | 1.65 (0.66 - 4.12)  | 1.43 (0.91 - 2.25)  | 1.25 (1.00 - 1.58) | 2.06 (1.77 - 2.40)  | 2.11 (1.91 - 2.34)   |
| Decreasing light smokers | 1.12 (0.50 - 2.50)  | 1.26 (0.85 - 1.87)  | 1.84 (1.52 - 2.23) | 3.80 (3.32 - 4.36)  | 4.30 (3.92 - 4.73)   |
| Steady moderate smokers  | 0.82 (0.39 - 1.73)  | 1.94 (1.38 - 2.75)  | 3.52 (2.97 - 4.17) | 6.77 (5.96 - 7.69)  | 6.70 (6.10 - 7.36)   |
| Steady heavy smokers     | 1.06 (0.33 - 3.46)  | 3.01 (1.94 - 4.68)  | 5.98 (4.88 - 7.34) | 10.48 (8.9 - 12.35) | 10.07 (8.31 - 12.19) |
| Kidney                   |                     |                     |                    |                     |                      |
| Never smokers            | ref                 | ref                 | ref                | ref                 | ref                  |
| Former smokers           | n/a                 | 1.34 (0.42 - 4.23)  | 0.66 (0.31 - 1.40) | 0.94 (0.56 - 1.56)  | 0.99 (0.64 - 1.54)   |
| New current smokers      | 0.75 (0.08 - 7.31)  | 1.28 (0.41 - 4.03)  | 0.73 (0.35 - 1.49) | 0.64 (0.38 - 1.09)  | 0.94 (0.64 - 1.37)   |
| Decreasing light smokers | n/a                 | 1.47 (0.57 - 3.81)  | 1.02 (0.57 - 1.83) | 0.75 (0.45 - 1.24)  | 1.27 (0.85 - 1.90)   |
| Steady moderate smokers  | 0.17 (0.02 - 1.72)  | 2.00 (0.85 - 4.69)  | 1.13 (0.66 - 1.92) | 1.21 (0.79 - 1.86)  | 1.35 (0.85 - 2.15)   |
| Steady heavy smokers     | 1.03 (0.09 - 11.47) | 0.98 (0.20 - 4.77)  | 0.86 (0.32 - 2.30) | 1.08 (0.42 - 2.76)  | 0.92 (0.13 - 6.69)   |
| Bladder                  |                     |                     |                    |                     |                      |
| Never smokers            | ref                 | ref                 | ref                | ref                 | ref                  |
| Former smokers           | n/a                 | 1.78 (0.11 - 28.69) | 0.90 (0.26 - 3.07) | 1.40 (0.80 - 2.47)  | 1.33 (0.95 - 1.88)   |
| New current smokers      | n/a                 | 3.47 (0.31 - 38.30) | 0.89 (0.26 - 3.03) | 1.24 (0.73 - 2.12)  | 1.40 (1.04 - 1.87)   |
| Decreasing light smokers | n/a                 | 7.49 (0.93 - 60.26) | 2.60 (1.07 - 6.29) | 1.64 (0.99 - 2.71)  | 1.74 (1.28 - 2.37)   |

|                          |                     |                     |                    |                    |                    |
|--------------------------|---------------------|---------------------|--------------------|--------------------|--------------------|
| Steady moderate smokers  | n/a                 | 2.39 (0.26 - 21.60) | 2.49 (1.06 - 5.85) | 2.04 (1.28 - 3.26) | 2.41 (1.74 - 3.33) |
| Steady heavy smokers     | n/a                 | 3.36 (0.20 - 55.14) | 3.07 (0.95 - 9.92) | 1.74 (0.67 - 4.56) | 2.03 (0.64 - 6.45) |
| <b>Leukemia</b>          |                     |                     |                    |                    |                    |
| Never smokers            | ref                 | ref                 | ref                | ref                | ref                |
| Former smokers           | 1.64 (0.43 - 6.22)  | 0.71 (0.35 - 1.46)  | 1.25 (0.78 - 2.01) | 0.95 (0.59 - 1.54) | 0.84 (0.58 - 1.23) |
| New current smokers      | 4.18 (1.73 - 10.14) | 1.02 (0.56 - 1.85)  | 1.29 (0.81 - 2.05) | 1.51 (1.03 - 2.21) | 1.20 (0.90 - 1.61) |
| Decreasing light smokers | 0.95 (0.34 - 2.63)  | 0.71 (0.41 - 1.23)  | 1.28 (0.83 - 1.96) | 1.33 (0.89 - 1.98) | 1.20 (0.87 - 1.66) |
| Steady moderate smokers  | 1.55 (0.68 - 3.51)  | 0.69 (0.42 - 1.12)  | 1.13 (0.75 - 1.70) | 1.82 (1.27 - 2.61) | 1.35 (0.94 - 1.94) |
| Steady heavy smokers     | 2.32 (0.68 - 7.93)  | 0.76 (0.33 - 1.77)  | 1.26 (0.64 - 2.50) | 1.16 (0.49 - 2.71) | 0.54 (0.07 - 3.85) |
| <b>Others</b>            |                     |                     |                    |                    |                    |
| Never smokers            | ref                 | ref                 | ref                | ref                | ref                |
| Former smokers           | 1.83 (0.80 - 4.19)  | 0.89 (0.62 - 1.28)  | 1.05 (0.87 - 1.26) | 0.99 (0.85 - 1.15) | 1.02 (0.91 - 1.13) |
| New current smokers      | 1.26 (0.60 - 2.66)  | 1.12 (0.81 - 1.56)  | 0.93 (0.76 - 1.13) | 0.95 (0.83 - 1.10) | 1.03 (0.94 - 1.14) |
| Decreasing light smokers | 1.93 (1.10 - 3.37)  | 0.94 (0.71 - 1.26)  | 0.97 (0.81 - 1.15) | 1.08 (0.95 - 1.24) | 1.17 (1.06 - 1.29) |
| Steady moderate smokers  | 1.10 (0.64 - 1.90)  | 0.97 (0.75 - 1.26)  | 1.11 (0.95 - 1.30) | 1.21 (1.06 - 1.37) | 1.19 (1.07 - 1.34) |
| Steady heavy smokers     | 1.10 (0.43 - 2.81)  | 1.05 (0.70 - 1.59)  | 1.27 (0.98 - 1.64) | 1.13 (0.86 - 1.49) | 1.39 (0.95 - 2.04) |

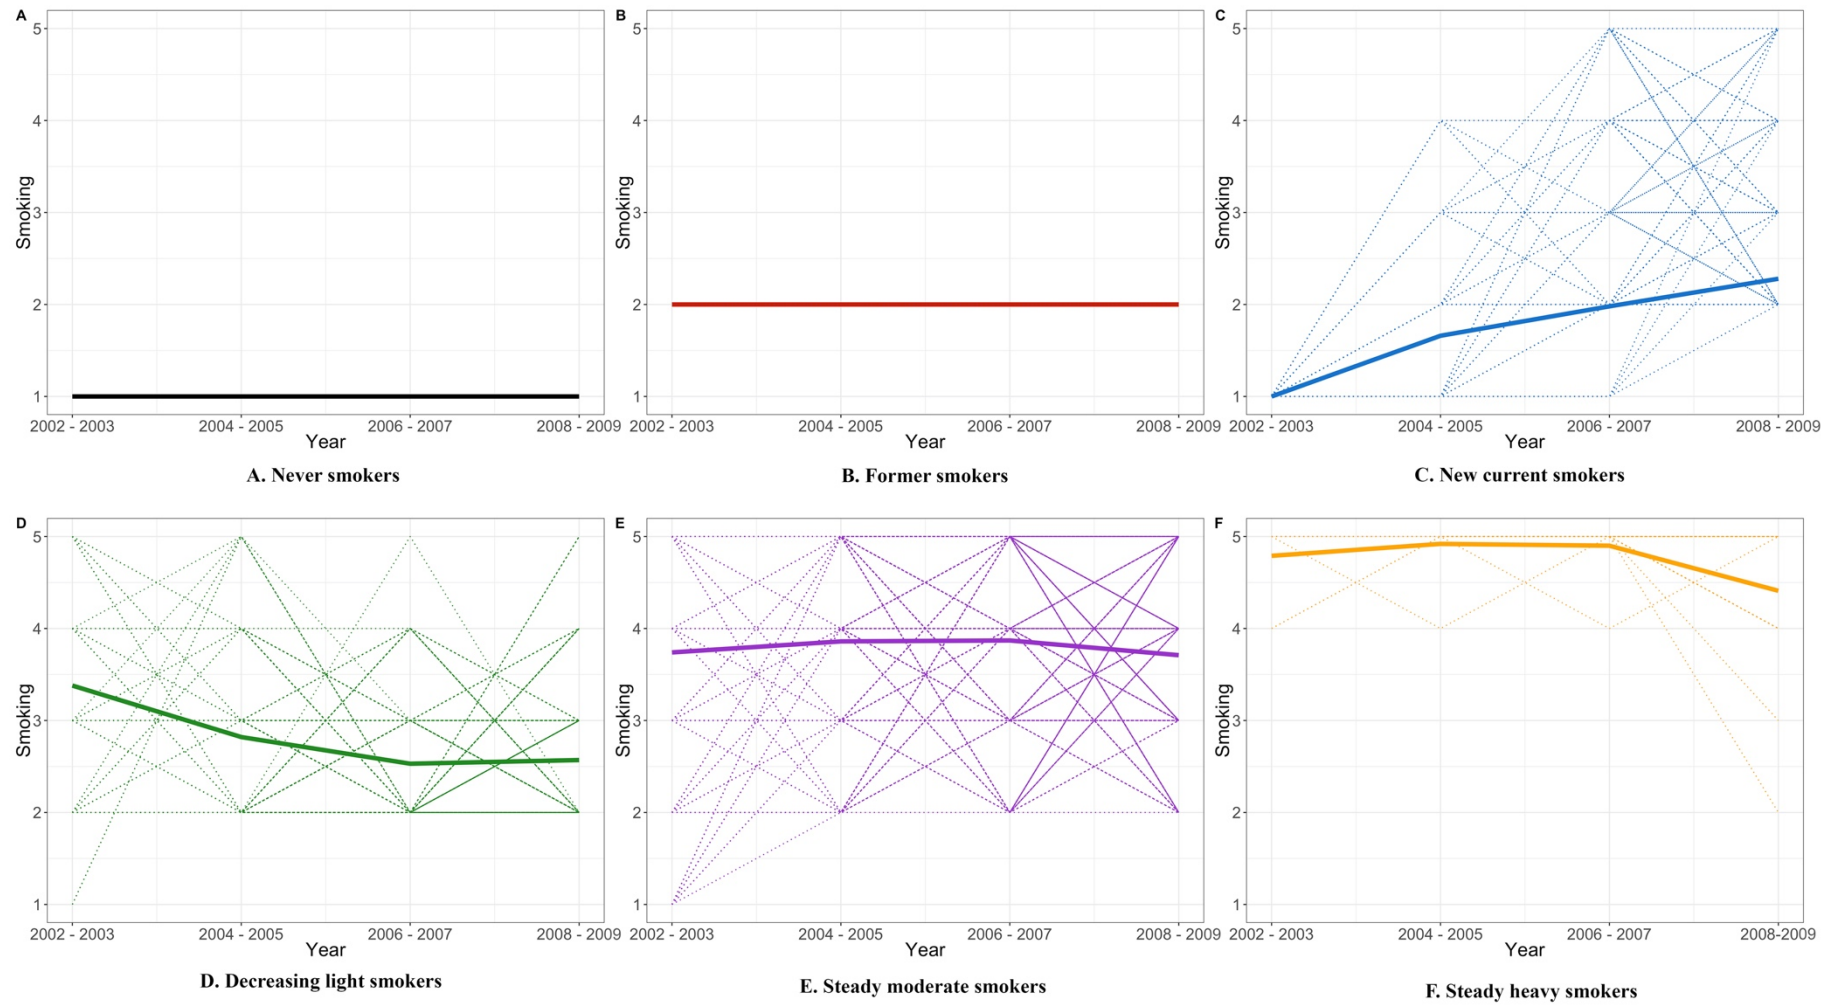

Appendix Figure 1. Smoking pattern of participants from 2002-2009 by smoking trajectory groups.

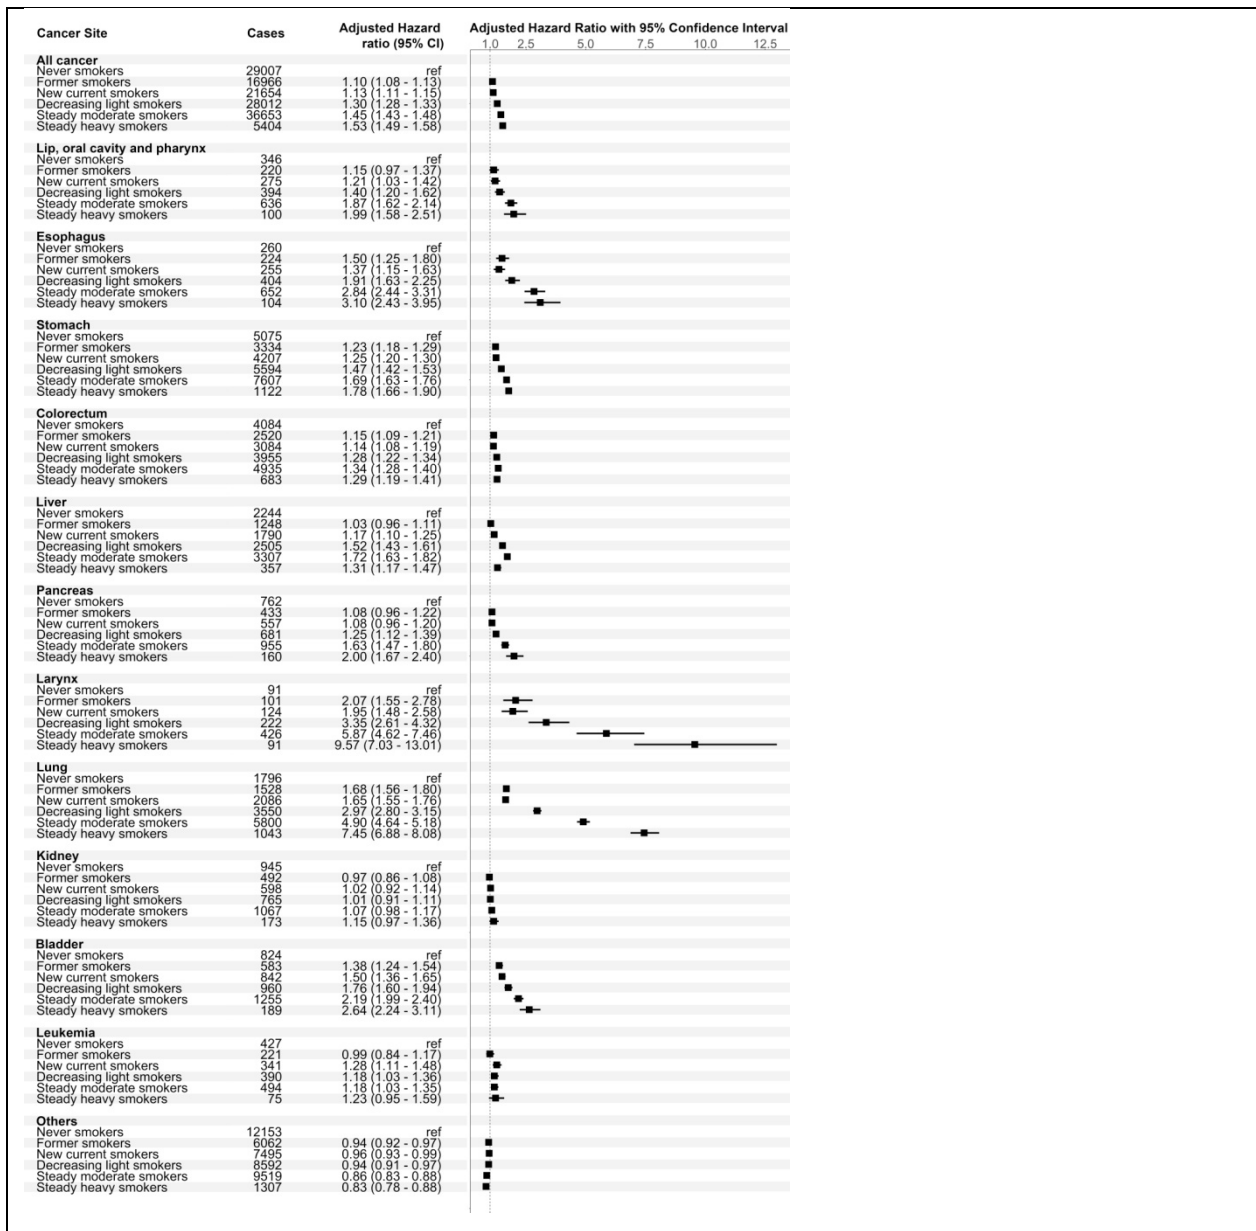

Appendix Figure 2. Smoking trajectory and cancer incidence (Cox proportional hazards model)



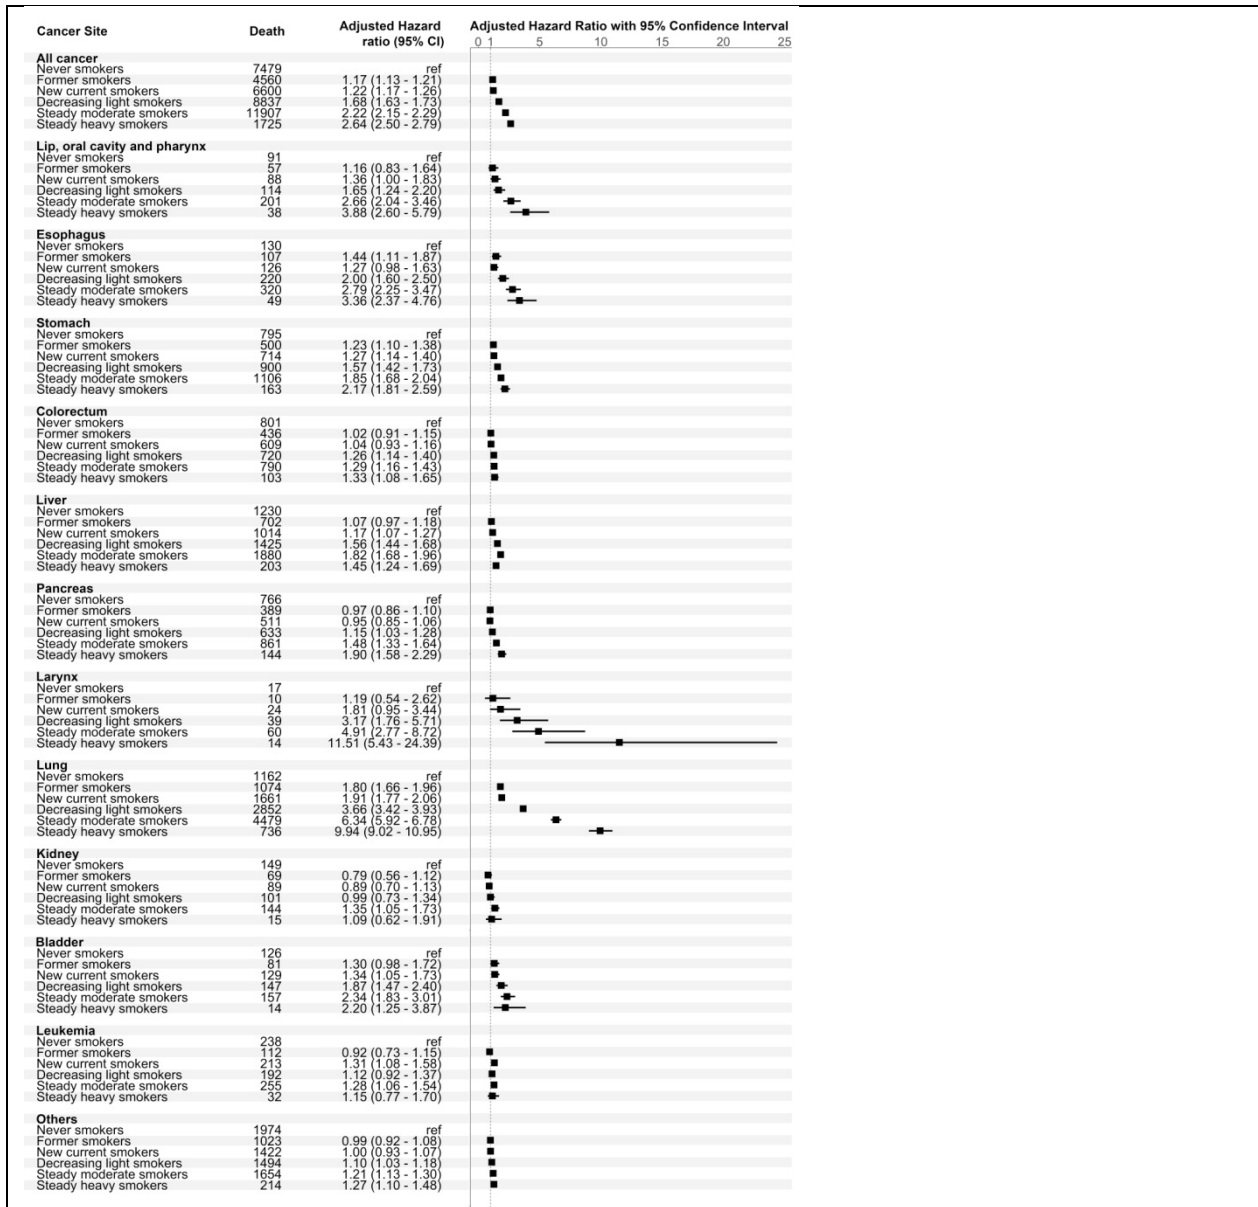

© 2022 Luu M.N. et al.

Appendix Figure 3. Smoking trajectory and cancer mortality (Cox proportional hazards model)
